**SO029 FIRST YEAR RENAL OUTCOME OF TRANSPLANTATIONS OF KIDNEYS FROM HEPATITIS C INFECTED DONORS TO HEPATITIS C NEGATIVE RECIPIENTS**

Miklos Zsolt Molnar<sup>1,2</sup>, Manish Talwar<sup>1,2</sup>, Vasanthi Balaraman<sup>1,2</sup>, Anshul Bhalla<sup>1,2</sup>, Ambreen Azhar<sup>1,2</sup>, Masahiko Yazawa<sup>1,2,3</sup>, Makoto Tsujita<sup>1,2,4</sup>, Pradeep Podila<sup>5</sup>, Sathesh Nair<sup>1,2</sup>, James Eason<sup>1,2</sup>

<sup>1</sup>Methodist University Hospital, James D Eason Transplant Institute, Memphis, United States of America, <sup>2</sup>University of Tennessee Health Science Center, Surgery, Memphis, United States of America, <sup>3</sup>St. Marianna University School of Medicine, Division of Nephrology and Hypertension, Japan, <sup>4</sup>Nagoya Daini Red Cross Hospital, Division of Nephrology and Hypertension, Japan and <sup>5</sup>Methodist Le Bonheur Healthcare, Memphis, United States of America

**Background and Aims:** Transplant centers in US are increasingly willing to transplant kidneys from hepatitis C infected donors to hepatitis C negative recipients. Long-term renal outcome data from non-prophylactic treatment approach outside clinical trials is missing.

**Method:** We compared kidney graft function of 132 hepatitis C negative recipients, who received HCV infected (NAT+ and antibody+/-; HCV+) versus HCV negative (NAT- and antibody-; HCV-) in 2018, in a single center, retrospective, observational study. Categorical variables were compared using  $\chi^2$  tests and continuous variables were compared using t-tests or Mann-Whitney U-tests, as appropriate. Linear regression was applied to assess independent association between graft function and HCV viremic status.

**Results:** The mean  $\pm$  SD age of recipients was 52  $\pm$  11 years, 44% were female, 20% and 79% of recipients were Caucasian and African-American, respectively. Baseline characteristics were similar between HCV+ vs HCV- groups, except dialysis duration, donors race, KDPI and cold ischemic time (Table). The DGF rate, estimated GFRs at post-transplant 3, 6, 9 and 12 months was similar between HCV+ and HCV- groups (Table). HCV viremic status was not a predictor of 3, 6, 9 and 12 months eGFR in our unadjusted model and after adjustment for donor and recipient characteristics.

**Conclusion:** Recipients of HCV-viremic kidneys have similar renal allograft function in the first year after transplantation compared to those who received from HCV-non-viremic kidneys.

Table:

| Parameter                                 | Entire cohort | HCV+       | HCV-       | P-value |
|-------------------------------------------|---------------|------------|------------|---------|
| Observations (n)                          | 132           | 73         | 59         |         |
| <i>Recipient baseline characteristics</i> |               |            |            |         |
| Age (years), mean (SD)                    | 52 (11)       | 52 (11)    | 52 (12)    | 0.86    |
| Female gender, N, (%)                     | 58 (44%)      | 30 (41%)   | 28 (47%)   | 0.46    |
| <i>Race, N, (%)</i>                       |               |            |            |         |
| Caucasian                                 | 27 (20%)      | 14 (19%)   | 13 (22%)   | 0.62    |
| African American                          | 104 (79%)     | 58 (80%)   | 46 (78%)   |         |
| Other                                     | 1 (1%)        | 1 (1%)     | 0 (0%)     |         |
| Dialysis duration (months), median (IQR)  | 60 (37-87)    | 49 (30-75) | 71 (50-98) | <0.01   |
| <i>Comorbidity, N, (%)</i>                |               |            |            |         |
| Diabetes                                  | 61 (46%)      | 36 (49%)   | 25 (42%)   | 0.43    |
| Hypertension                              | 128 (97%)     | 71 (97%)   | 57 (97%)   | 0.83    |
| Peripheral vascular disease               | 9 (7%)        | 8 (11%)    | 1 (2%)     | 0.04    |
| Coronary artery disease                   | 21 (16%)      | 11 (15%)   | 10 (17%)   | 0.74    |
| Chronic obstructive pulmonary disease     | 8 (6%)        | 5 (7%)     | 3 (5%)     | 0.67    |
| <i>Donor Characteristics</i>              |               |            |            |         |
| Age (years), mean (SD)                    | 33 (10)       | 32 (5)     | 34 (13)    | 0.17    |
| Female gender, N, (%)                     | 60 (45%)      | 37 (47%)   | 26 (44%)   | 0.77    |
| DCD, N, (%)                               | 18 (14%)      | 8 (11%)    | 10 (17%)   | 0.32    |
| <i>Comorbidity, N, (%)</i>                |               |            |            |         |

Continued

Continued

| Parameter                                                            | Entire cohort    | HCV+             | HCV-            | P-value |
|----------------------------------------------------------------------|------------------|------------------|-----------------|---------|
| Diabetes                                                             | 2 (2%)           | 1 (1%)           | 1 (2%)          | 0.88    |
| Hypertension                                                         | 12 (9%)          | 6 (8%)           | 6 (10%)         | 0.70    |
| <i>Race, N, (%)</i>                                                  |                  |                  |                 |         |
| Caucasian                                                            | 107 (82%)        | 70 (96%)         | 37 (64%)        | <0.01   |
| African American                                                     | 21 (16%)         | 0 (0%)           | 21 (36%)        |         |
| Other                                                                | 3 (2%)           | 3 (4%)           | 0 (0%)          |         |
| KDPI, mean (SD)                                                      | 45 (19)          | 50 (16)          | 38 (21)         | <0.01   |
| <i>Transplant characteristics</i>                                    |                  |                  |                 |         |
| Cold Ischemic Time (hours), median (IQR)                             | 18.2 (12.7-21.8) | 19.3 (16.2-23.2) | 15.3 (9.1-20.3) | <0.01   |
| ATG dose (mg/kg), mean (SD)                                          | 4.9 (0.9)        | 4.8 (0.8)        | 5.0 (1.3)       | 0.25    |
| <i>Renal Outcome Data</i>                                            |                  |                  |                 |         |
| Delayed Graft Function, N, (%)                                       | 13 (10%)         | 6 (8%)           | 7 (12%)         | 0.49    |
| Estimated GFR at 3 months after transplantation (ml/min), mean (SD)  | 63 (19)          | 63 (17)          | 64 (21)         | 0.76    |
| Estimated GFR at 6 months after transplantation (ml/min), mean (SD)  | 66 (19)          | 66 (17)          | 66 (21)         | 0.97    |
| Estimated GFR at 9 months after transplantation (ml/min), mean (SD)  | 66 (17)          | 66 (15)          | 67 (20)         | 0.61    |
| Estimated GFR at 12 months after transplantation (ml/min), mean (SD) | 65 (19)          | 65 (16)          | 66 (22)         | 0.65    |

Downloaded from [https://academic.oup.com/ndt/article/35/Supplement\\_3/gfaa139/SO029/5852215](https://academic.oup.com/ndt/article/35/Supplement_3/gfaa139/SO029/5852215) by guest on 20 April 2024
